# Supplementary material for: TopBP1 is required at mitosis to reduce transmission of DNA damage to G1 daughter cells
Source: PubMed Central journal article supplement — J Cell Biol. 2015 Aug 17;210(4):565–82. doi: 10.1083/jcb.201502107 (PMC4539992; doi:10.1083/jcb.201502107), 2015-08-17
Supplement: supp_jcb.201502107_JCB_201502107_sm.pdf [file supp_jcb.201502107_JCB_201502107_sm.pdf]

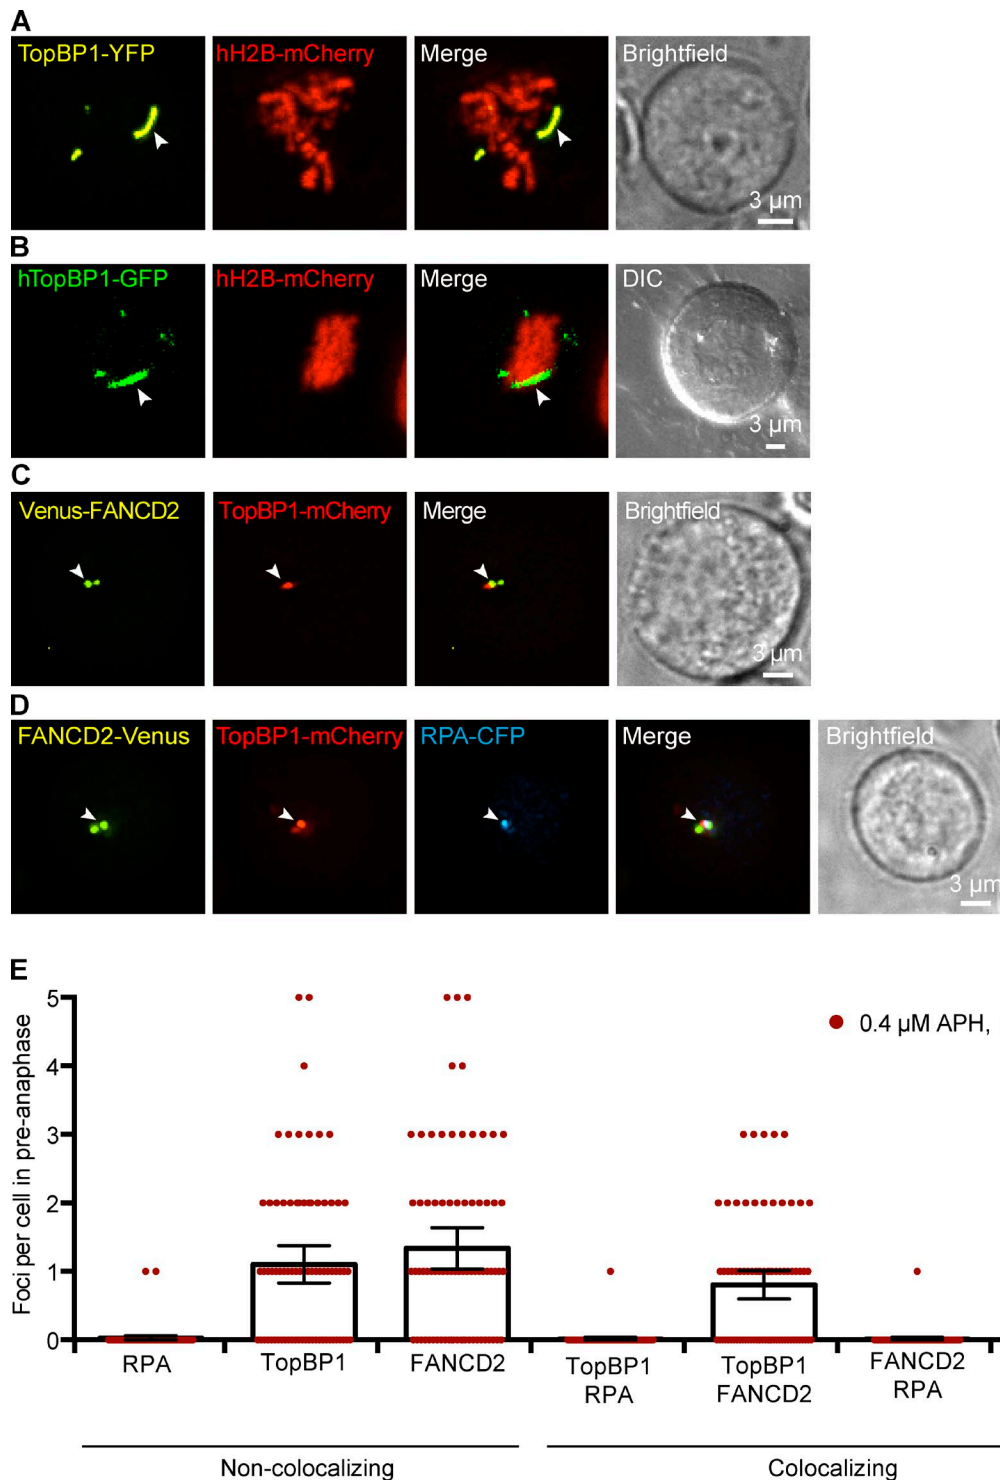

Figure S1. **TopBP1 thread-like structures in mitosis.** (A) Representative images of the DT40 cell line RTP217 displaying a TopBP1 thread-like structure in mitosis. Arrowheads indicate TopBP1 thread-like structures. (B) Representative images of an untreated HeLa cell transiently transfected with constructs expressing GFP-hTopBP1 and hH2B-mCherry displaying a TopBP1 thread-like structure in mitosis. Arrowheads indicate TopBP1 thread-like structures. (C) Representative images of APH-treated DT40 cell line RTP284. Arrowheads indicate TopBP1 colocalization with FANCD2 sister foci. (D) Representative images of APH-treated DT40 cell line, RTP356 (TopBP1<sup>mCherry/WT</sup>/RPA<sup>CFP/WT</sup>/FANCD2<sup>Venus/WT</sup>). Arrowheads indicate TopBP1 and RPA colocalization with a FANCD2 sister focus. (E) Quantification of RPA, FANCD2, and TopBP1 foci in live cell images. RTP356 cells were treated with 0.4  $\mu$ M APH for 20 h before imaging. RPA, FANCD2, and TopBP1 foci in preanaphase cells were quantified. Error bars represent 95% confidence intervals. The number of cells analyzed is indicated in the graph (n).

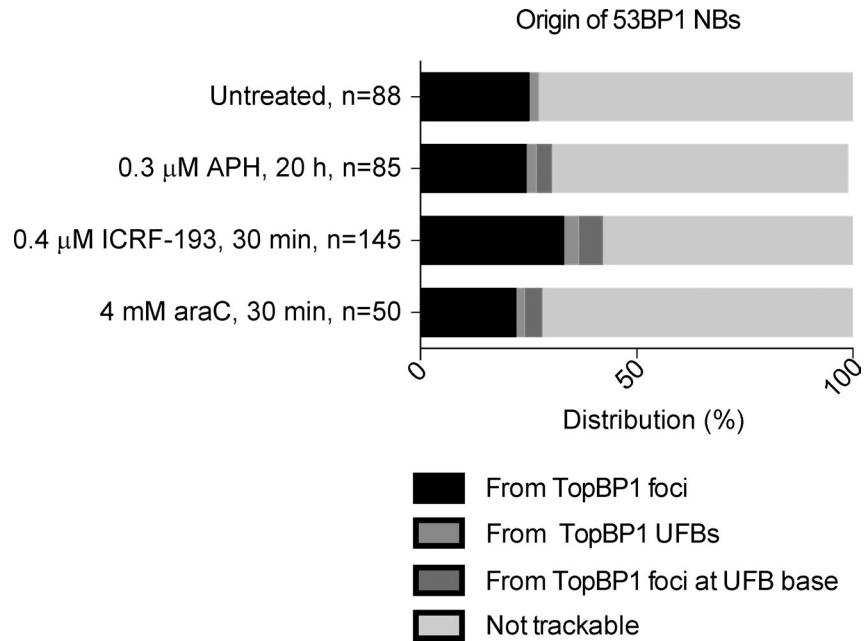

Figure S2. **Bar chart of the anaphase/telophase TopBP1 structures leading to 53BP1 NBs in G1.** Distribution of mitotic structures that transition into 53BP1 NBs. Time-lapse microscopy of the DT40 cell line RTP252 with an imaging frequency of 2 min for 30 min is quantified. Cells were monitored from anaphase to early G1, which was defined as the first 10 min after chromatin decondensation. TopBP1 was tracked as far back as possible from G1 into anaphase/telophase. The number of foci analyzed is indicated (*n*). Cells were treated with 0.4  $\mu$ M APH for 20 h, 0.4  $\mu$ M ICRF-193 for 30 min, or 0.0125% DMSO (vol/vol, untreated) for 20 h before imaging.

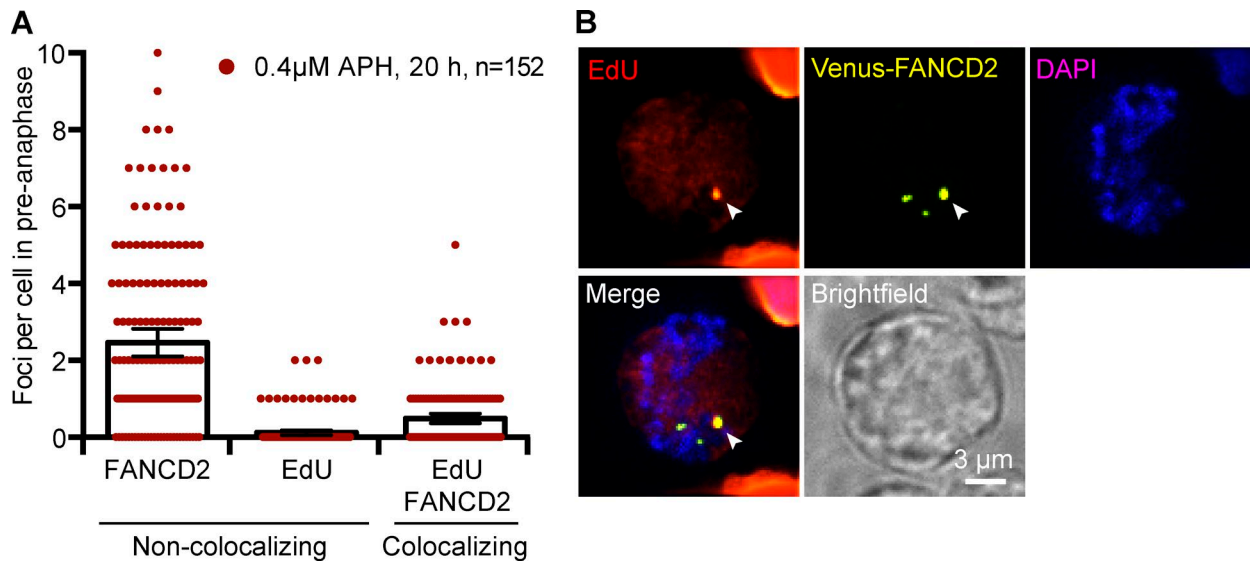

Figure S3. **FANCD2 localizes to unscheduled DNA synthesis in mitosis.** (A) Quantification of EdU and FANCD2 foci in prometaphase and metaphase cells in the DT40 cell line VH2 (FANCD2<sup>Venus/WT</sup>). Before fixation, cells were treated with 0.4  $\mu$ M APH for 20 h and pulse labeled with 20  $\mu$ M EdU for the last 20 min. FANCD2 foci and EdU foci were quantified in prometaphase and metaphase. Phases were identified based on chromatin condensation. Error bars represent 95% confidence intervals. The number of cells analyzed is indicated in the graph (*n*). (B) Representative images of fixed cells treated with 0.4  $\mu$ M APH for 20 h and pulse labeled with 20  $\mu$ M EdU for 20 min. White arrowheads indicate FANCD2 foci colocalizing with EdU.

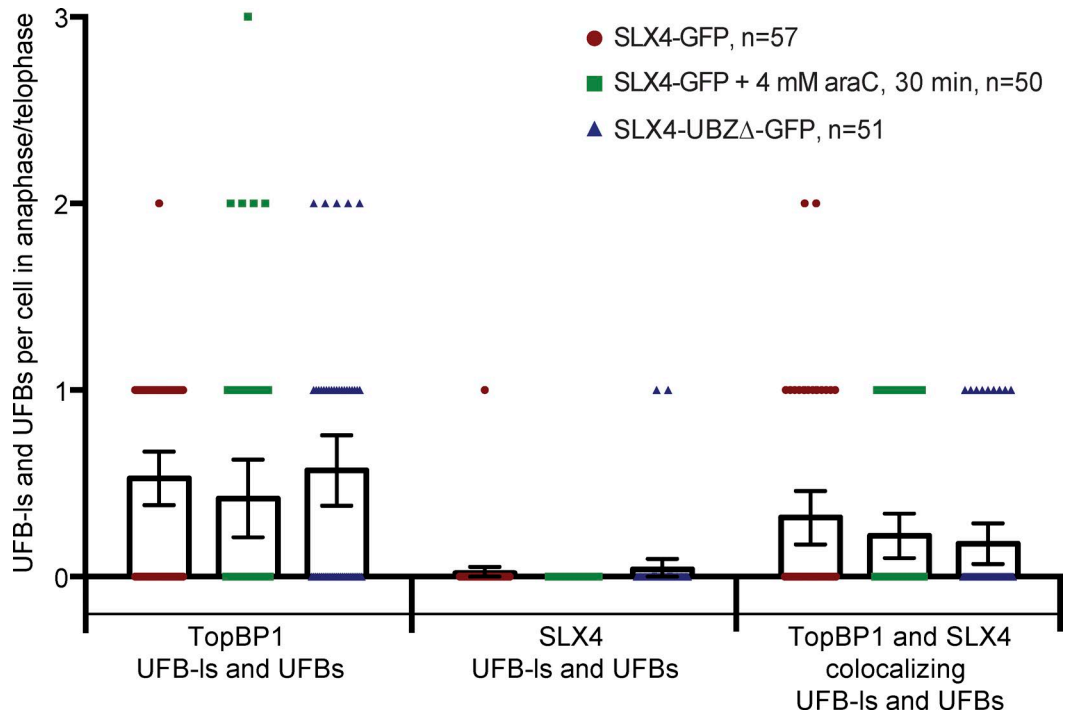

Figure S4. **TopBP1 and SLX4 colocalize on UFBs.** Quantification of SLX4 and TopBP1 UFBs or UFBs in the cell lines RTP302 and RTP305. Cells were treated with or without 4 mM araC for 30 min before the beginning of the time-lapse experiments, and monitored from anaphase to telophase. The maximum number of structures visible at one time point was noted as representative for anaphase of a given cell. Error bars represent 95% confidence intervals. The number of cells analyzed is indicated in the graph (*n*).

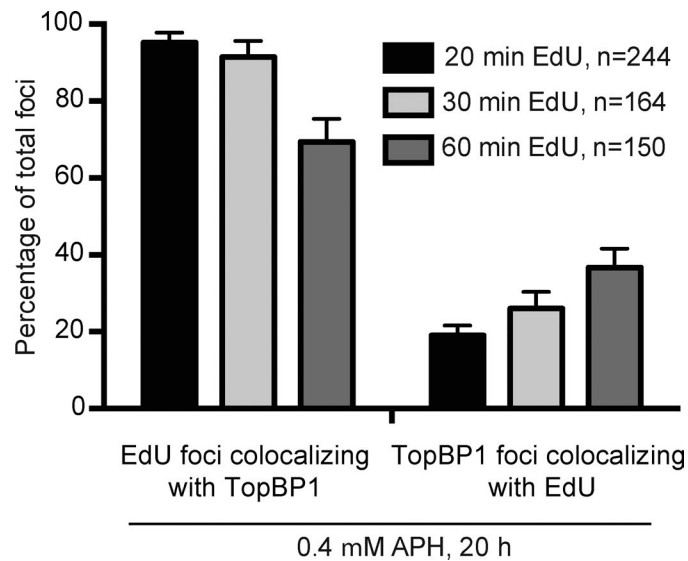

Figure S5. **Prolonged EdU pulse increases the colocalization with TopBP1.** A quantification of the relationship between the length of the EdU pulse and colocalization of EdU and TopBP1 foci is shown. The experimental setup was identical to Fig. 5 C, except that 30- and 60-min EdU pulses were applied as indicated. Error bars represent 95% confidence intervals. The number of foci analyzed is indicated in the graph (*n*).

Table S1. DT40 cell lines used in this study

| Cell line | Genotype                                                                                                            | Source                  |
|-----------|---------------------------------------------------------------------------------------------------------------------|-------------------------|
| DT40      | Wild type                                                                                                           | Buerstedde et al., 1990 |
| VH1       | TopBP1 <sup>YFP/WT/WT</sup> (BSR)                                                                                   | Germann et al., 2011    |
| VH2       | FANCD2 <sup>Venus/WT</sup> (loxed)                                                                                  | This study              |
| X1        | FANCD2 <sup>-/-</sup> (HIS/BSR)                                                                                     | Yamamoto et al., 2005   |
| RTP156    | TopBP1 <sup>YFP/WT/WT</sup> (BSR), RPA <sup>CFP/WT</sup> (BSR), hH2B-mCherry (BSR)                                  | Germann et al., 2014    |
| RTP164    | TopBP1 <sup>YFP-AID/YFP-AID/YFP-AID</sup> (loxed), osTIR (NEO)                                                      | This study              |
| RTP217    | TopBP1 <sup>YFP-AID/YFP-AID/YFP-AID</sup> (loxed), 53BP1 <sup>TFP/WT</sup> (BSR), osTIR (loxed), hH2B-mCherry (PAC) | This study              |
| RTP252    | PICH <sup>YFP/YFP</sup> (loxed), 53BP1 <sup>TFP/WT</sup> (BSR), TopBP1 <sup>mCherry/WT/WT</sup> (PAC)               | This study              |
| RTP284    | PICH <sup>TFP/WT</sup> (loxed), FANCD2 <sup>Venus/WT</sup> (loxed), TopBP1 <sup>mCherry/WT/WT</sup> (PAC)           | This study              |
| RTP292    | hH2B-mCherry (PAC)                                                                                                  | This study              |
| RTP302    | TopBP1 <sup>mCherry/WT</sup> (BSR), SLX4-GFP (NEO)                                                                  | This study              |
| RTP305    | TopBP1 <sup>mCherry/WT</sup> (BSR), SLX4-ΔUBZ-GFP (NEO)                                                             | This study              |
| RTP315    | TopBP1 <sup>YFP-AID/YFP-AID/YFP-AID</sup> (loxed), Topoll <sup>α</sup> <sup>TFP/WT</sup> (PAC), osTIR (NEO)         | This study              |
| RTP317    | TopBP1 <sup>YFP-AID/YFP-AID/YFP-AID</sup> (loxed), GFP-hTopBP1 (BSR), osTIR (NEO)                                   | This study              |
| RTP319    | TopBP1 <sup>YFP-AID/YFP-AID/YFP-AID</sup> (loxed), SLX4-GFP (BSR), osTIR (NEO)                                      | This study              |
| RTP328    | TopBP1 <sup>mCherry/WT</sup> (BSR), Topoll <sup>β</sup> <sup>GFP/WT</sup> (PAC)                                     | This study              |
| RTP335    | PICH <sup>mCherry/mCherry</sup> (loxed), SLX4-GFP (BSR)                                                             | This study              |
| RTP349    | SLX4-GFP (NEO), FANCD2 <sup>-/-</sup> (HIS/BSR)                                                                     | This study              |
| RTP356    | TopBP1 <sup>mCherry/WT</sup> (loxed), RPA <sup>CFP/WT</sup> (loxed), FANCD2 <sup>Venus/WT</sup> (loxed)             | This study              |
| RTP368    | TopBP1 <sup>YFP-AID/YFP-AID/YFP-AID</sup> (loxed), GFP-hTopBP1-ΔNLS (PAC), osTIR (NEO)                              | This study              |

DT40 cell lines in this study are derivatives of DT40 wild type (Buerstedde et al., 1990).

Table S2. Plasmids used in this study

| Plasmid         | Relevant markers                                                             | Source                   |
|-----------------|------------------------------------------------------------------------------|--------------------------|
| pRTP5           | AMP <sup>r</sup> PICH-YFP BSR                                                | Germann et al., 2014     |
| pRTP7           | AMP <sup>r</sup> 53BP1-YFP BSR                                               | Oestergaard et al., 2012 |
| pRTP9           | AMP <sup>r</sup> PICH-YFP PAC                                                | Germann et al., 2014     |
| pRTP14          | AMP <sup>r</sup> TopBP1-YFP-AID NEO                                          | Germann et al., 2014     |
| pRTP15          | AMP <sup>r</sup> TopBP1-YFP-AID BSR                                          | Germann et al., 2014     |
| pRTP16          | AMP <sup>r</sup> TopBP1-YFP-AID PAC                                          | Germann et al., 2014     |
| pRTP17          | AMP <sup>r</sup> PICH-TFP BSR                                                | Germann et al., 2014     |
| pRTP23          | AMP <sup>r</sup> Human H2B-mCherry (chicken $\beta$ -actin promoter) PAC     | Germann et al., 2014     |
| pRTP24          | AMP <sup>r</sup> osTIR (chicken $\beta$ -actin promoter) NEO                 | This study               |
| pRTP27          | AMP <sup>r</sup> TopBP1-mCherry BSR                                          | This study               |
| pRTP28          | AMP <sup>r</sup> TopBP1-mCherry PAC                                          | This study               |
| pRTP31          | AMP <sup>r</sup> 53BP1-TFP BSR                                               | This study               |
| pRTP32          | AMP <sup>r</sup> PICH-mCherry BSR                                            | This study               |
| pRTP33          | AMP <sup>r</sup> PICH-mCherry PAC                                            | This study               |
| pRTP37          | AMP <sup>r</sup> Topoll <sup>α</sup> -TFP PAC                                | This study               |
| pRTP38          | AMP <sup>r</sup> Human TopBP1-GFP (chicken $\beta$ -actin promoter) BSR      | This study               |
| pRTP40          | AMP <sup>r</sup> Chicken SLX4-GFP (chicken $\beta$ -actin promoter) BSR      | This study               |
| pRTP46          | AMP <sup>r</sup> Human TopBP1-ΔNLS-GFP (chicken $\beta$ -actin promoter) PAC | This study               |
| pVHO2           | AMP <sup>r</sup> RPA-CFP BSR                                                 | Germann et al., 2011     |
| pVHO3           | AMP <sup>r</sup> TopBP1-YFP BSR                                              | Germann et al., 2011     |
| pVHO4           | AMP <sup>r</sup> Venus-FANCD2 PAC                                            | This study               |
| pX33            | AMP <sup>r</sup> Topoll <sup>α</sup> -FLAG PAC                               | Johnson et al., 2009     |
| pX34            | AMP <sup>r</sup> Topoll <sup>β</sup> -GFP PAC                                | Johnson et al., 2009     |
| pX45            | Kan <sup>r</sup> Chicken SLX4-GFP NEO                                        | Yamamoto et al., 2011    |
| pX46            | Kan <sup>r</sup> Chicken SLX4-UBZΔ-GFP NEO                                   | Yamamoto et al., 2011    |
| pExpress        | AMP <sup>r</sup> chicken $\beta$ -actin promoter                             | Arakawa et al., 2001     |
| pLOX-BSR        | AMP <sup>r</sup> BSR                                                         | Arakawa et al., 2001     |
| pLOX-PURO       | AMP <sup>r</sup> PAC                                                         | Arakawa et al., 2001     |
| pLOX-NEO        | AMP <sup>r</sup> NEO                                                         | Arakawa et al., 2001     |
| pPGK-CRE        | AMP <sup>r</sup> CRE                                                         | Arakawa et al., 2001     |
| pmTurquoise2-N1 | Kan <sup>r</sup> mTurquoise2                                                 | Goedhart et al., 2010    |
| pmCherry-C1     | Kan <sup>r</sup> mCherry                                                     | Takara Bio Inc.          |
| pNHK65          | Kan <sup>r</sup> osTIR1 NEO                                                  | Nishimura et al., 2009   |

Table S3. **Primer list**

| Primer | Sequence (5' to 3')                 | Use                                                  |
|--------|-------------------------------------|------------------------------------------------------|
| VO128  | TCTAGAATGGTGAGCAAGGGCGAG            | Forward primer for mCherry tag for pRTP27            |
| VO129  | AGATCTGCTTACTTGACAGCTCGTCC          | Reverse primer for mCherry tag for pRTP27            |
| RTP59  | GTCGACGGTATGGTGAGCAAGGGCGAGGAG      | Forward primer for mCherry tag for pRTP32-33         |
| RTP60  | GAATCTTACTTGACAGCTCGTCC             | Reverse primer for mCherry tag for pRTP32-33         |
| RTP68  | GCTAGCTTATTGTGATAATCCAGTCCCAAG      | Reverse primer for <i>GFP-TopBP1-ΔNLS</i> for pRTP46 |
| RTP72  | ATGTCGTAACAACCTCCGCC                | Forward primer for <i>GFP-TopBP1-ΔNLS</i> for pRTP46 |
| VO67   | AGGGATCCACCATG GTGAGCAAGGGCGAGGAG   | Forward primer for Venus tag                         |
| VO252  | ACT AGT CTTGTACAGCTCGTCC            | Reverse primer for Venus tag                         |
| VO300  | ACTAGTGTTCGAAAAGGAAGTTGTCT          | Forward primer for FANCD2 5' arm                     |
| VO301  | GCGGGCCGCTATCCAGCAATATATTATCTGCCAGT | Reverse primer for FANCD2 5' arm                     |
| VO302  | GTCGACATTCAGCAATGAAACCTCTGAGGAAAG   | Forward primer for FANCD2 3' arm                     |
| VO303  | GGATCCTTTGCTACTGCCTGTAAGAAC         | Reverse primer for FANCD2 3' arm                     |

## References

- Arakawa, H., D. Lodygin, and J.M. Buerstedde. 2001. Mutant loxP vectors for selectable marker recycle and conditional knock-outs. *BMC Biotechnol.* 1:7. <http://dx.doi.org/10.1186/1472-6750-1-7>
- Buerstedde, J.M., C.A. Reynaud, E.H. Humphries, W. Olson, D.L. Ewert, and J.C. Weill. 1990. Light chain gene conversion continues at high rate in an ALV-induced cell line. *EMBO J.* 9:921–927.
- Germann, S.M., V.H. Oestergaard, C. Haas, P. Salis, A. Motegi, and M. Lisby. 2011. Dpb11/TopBP1 plays distinct roles in DNA replication, checkpoint response and homologous recombination. *DNA Repair (Amst.)*. 10:210–224. <http://dx.doi.org/10.1016/j.dnarep.2010.11.001>
- Germann, S.M., V. Schramke, R.T. Pedersen, I. Gallina, N. Eckert-Boulet, V.H. Oestergaard, and M. Lisby. 2014. TopBP1/Dpb11 binds DNA anaphase bridges to prevent genome instability. *J. Cell Biol.* 204:45–59.
- Goedhart, J., L. van Weeren, M.A. Hink, N.O. Vischer, K. Jalink, and T.W. Gadella Jr. 2010. Bright cyan fluorescent protein variants identified by fluorescence lifetime screening. *Nat. Methods.* 7:137–139. <http://dx.doi.org/10.1038/nmeth.1415>
- Johnson, M., H.H. Phua, S.C. Bennett, J.M. Spence, and C.J. Farr. 2009. Studying vertebrate topoisomerase 2 function using a conditional knockdown system in DT40 cells. *Nucleic Acids Res.* 37:e98. <http://dx.doi.org/10.1093/nar/gkp480>
- Nishimura, K., T. Fukagawa, H. Takisawa, T. Kakimoto, and M. Kanemaki. 2009. An auxin-based degron system for the rapid depletion of proteins in nonplant cells. *Nat. Methods.* 6:917–922. <http://dx.doi.org/10.1038/nmeth.1401>
- Oestergaard, V.H., C. Pentzold, R.T. Pedersen, S. Iosif, A. Alpi, S. Bekker-Jensen, N. Mailand, and M. Lisby. 2012. RNF8 and RNF168 but not HERC2 are required for DNA damage-induced ubiquitylation in chicken DT40 cells. *DNA Repair (Amst.)*. 11:892–905. <http://dx.doi.org/10.1016/j.dnarep.2012.08.005>
- Yamamoto, K., S. Hirano, M. Ishiai, K. Morishima, H. Kitao, K. Namikoshi, M. Kimura, N. Matsushita, H. Arakawa, J.M. Buerstedde, et al. 2005. Fanconi anemia protein FANCD2 promotes immunoglobulin gene conversion and DNA repair through a mechanism related to homologous recombination. *Mol. Cell. Biol.* 25:34–43. <http://dx.doi.org/10.1128/MCB.25.1.34-43.2005>
- Yamamoto, K.N., S. Kobayashi, M. Tsuda, H. Kurumizaka, M. Takata, K. Kono, J. Jiricny, S. Takeda, and K. Hirota. 2011. Involvement of SLX4 in interstrand cross-link repair is regulated by the Fanconi anemia pathway. *Proc. Natl. Acad. Sci. USA.* 108:6492–6496. <http://dx.doi.org/10.1073/pnas.1018487108>
